# Supplementary material for: A novel highly specific and ultrasensitive fluorescent probe for monitoring hypochlorous acid and its application in live cells
Source: Royal Society of Chemistry journal article supplement (doi:10.1039/c8ra09551e), 2019-01-01
Supplement: c8ra09551e1.pdf [file c8ra09551e1.pdf]

## Supporting Information

### **A novel highly specific and ultrasensitive fluorescent probe for monitoring hypochlorous acid and its applications in live cells**

Xinyuan Li,<sup>a</sup> Liu Wu,<sup>b</sup> Ziyang Zhao,<sup>b</sup> Caiyun Liu,<sup>\*,b</sup> and Baocun Zhu <sup>b</sup>

<sup>a</sup> Class 15, Grade 2 (64), Laiyang No. 1 high school, Laiyang 265200, P. R. China

<sup>b</sup> School of Resources and Environment, University of Jinan, Shandong Provincial Engineering Technology Research Center for Ecological Carbon Sink and Capture Utilization, Jinan 250022, P. R. China.

\*Corresponding author. Fax: +86-531-82767617; Tel.: +86-531-82767617

*E-mail address:* liucaiyun1982072@163.com (C. Liu)

## Table of Contents

1. Determination of the detection limit
2. Cell culture and bioimaging
3. Cytotoxicity assays
4. Preparation of reactive oxygen species and reactive nitrogen species
5. Characterization of probe **TCFL**
6. HRMS of the reaction products of probe **TCFL** and HOCl

## 1. Determination of the detection limit

The detection limit was calculated based on the fluorescence titration. The fluorescence spectra of free probe **TCFL** were measured by eight times and its standard deviation was obtained. To gain the slope, the fluorescence intensities at 515 nm were plotted as the increasing concentrations of HOCl. So the detection limit was calculated with the following equation (1):

$$\text{Detection limit} = 3\sigma/k \quad (1)$$

Where  $\sigma$  is the standard deviation of blank measurement,  $k$  is the slope between the fluorescence intensities versus the concentrations of HOCl.

## 2. Cell culture and bioimaging

The live RAW 264.7 macrophage cells were cultured in DMEM containing 10% fetal bovine serum, 1% penicillin, and 1% streptomycin at 37 °C (w/v) in a 5% CO<sub>2</sub> / 95% air incubator MCO-15AC (Sanyo, Tokyo, Japan). The concentrations of counted cells were adjusted to  $1 \times 10^6$  cells mL<sup>-1</sup> for confocal imaging in high-glucose DMEM (4.5 g of glucose/L) supplemented with 10% fetal bovine serum (FBS), NaHCO<sub>3</sub> (2.0 ng/L), and 1% antibiotics (penicillin/streptomycin, 100.0 U/mL). Cultures were maintained at 37 °C under a humidified atmosphere containing 5% CO<sub>2</sub>.

After 24 h, the cells were incubated with 10  $\mu$ M **TCFL** in culture media for 30 min at 37 °C, and washed with PBS three times. Then the fluorescence imaging of the cells was carried out. After adding HOCl (20  $\mu$ M) to the above cells for 10 min, and washed with PBS three times. Then the fluorescence imaging of the cells was performed. On the other hand, the cells pretreated with PMA (2.0  $\mu$ g mL<sup>-1</sup>) or NAC (500  $\mu$ M) for 60 min were incubated with 10  $\mu$ M **TCFL** in culture media for another 30 min at 37 °C, and washed with PBS three times. Then the fluorescence imaging of cells was carried out. The fluorescence imaging of live RAW 264.7 macrophage cells

was observed under Leica TCS SP5.

### 3. Cytotoxicity assays

The live RAW 264.7 macrophage cells ( $1 \times 10^6$  cells  $\text{mL}^{-1}$ ) were dispersed within replicate 96-well microtiter plates to a total volume of 200  $\mu\text{L}$  well $^{-1}$ . Plates were maintained at 37 °C in a 5%  $\text{CO}_2$  / 95% air incubator for 24 h. Then the live RAW 264.7 macrophage cells were incubated for 12 h upon different probe concentrations of 5, 10, 20, and 30  $\mu\text{M}$ . 3-(4,5-dimethylthiazol-2-yl)-2,5-diphenyltetrazolium bromide (MTT) solution (5 mg  $\text{mL}^{-1}$ , HEPES) was then added to each well. After 4 h, the remaining MTT solution was removed, and 150  $\mu\text{L}$  of DMSO was added to each well to dissolve the formazan crystals. Absorbance was measured at 490 nm in a Triturus microplate reader.

### 4. Preparation of reactive oxygen species and reactive nitrogen species

Hydrogen peroxide ( $\text{H}_2\text{O}_2$ ), sodium hypochlorite ( $\text{NaOCl}$ ), and *tert*-butylhydroperoxide (TBHP) were diluted from the commercially available solution to 0.1 M in ultrapure water. Hydroxyl radical ( $\cdot\text{OH}$ ) and *tert*-butoxy radical ( $\cdot\text{O}^t\text{Bu}$ ) were generated by Fenton reactions. Superoxide anion ( $\text{O}_2^{\cdot-}$ ) was prepared from  $\text{KO}_2$  in DMSO. Singlet oxygen ( $^1\text{O}_2$ ) was generated from  $\text{HOCl}$  and  $\text{H}_2\text{O}_2$ . Nitric oxide ( $\text{NO}$ ) was generated from potassium nitroprusside dihydrate. Peroxynitrite was prepared according to the reported method (*J. Am. Chem. Soc.*, 1974, 96, 1248). The concentration of  $\text{H}_2\text{O}_2$  was determined from the absorbance at 240 nm ( $\epsilon = 43.6 \text{ M}^{-1} \text{ cm}^{-1}$ ). The concentration of  $\cdot\text{OCl}$  was determined from the absorbance at 292 nm ( $\epsilon = 350 \text{ M}^{-1} \text{ cm}^{-1}$ ). The concentration of  $\text{ONOO}^{\cdot-}$  was determined from the absorbance at 302 nm ( $1670 \text{ M}^{-1} \text{ cm}^{-1}$ ).

Chemical structure of compound 10 is shown in the top right corner. The structure is a substituted benzene ring with a carboxylic acid group, a hydroxyl group, and a side chain containing a double bond and a methyl group.

<sup>1</sup>H NMR spectrum (400 MHz, DMSO-d<sub>6</sub>) of compound 10. The x-axis is labeled 'f1 (ppm)' and ranges from 10.5 to 0.0. The spectrum shows several peaks:

- A broad peak at ~10.2 ppm (integral 1.00).
- A multiplet between 6.5-8.0 ppm (integrals 1.00, 1.00, 1.00, 1.00, 0.84, 1.00, 0.90, 0.90, 1.90).
- A sharp doublet at ~3.3 ppm (integrals 2.22, 2.94).

Chemical shifts (ppm):

- 186.05
- 169.01
- 160.18
- 155.44
- 152.06
- 151.43
- 136.27
- 130.78
- 129.60
- 128.99
- 128.29
- 125.29
- 124.52
- 119.70
- 116.80
- 113.12
- 111.71
- 109.60
- 102.73
- 82.57
- 43.34
- 40.43
- 40.33
- 40.22
- 39.01
- 39.60
- 39.39
- 38.11

**Fig. S2**  $^{13}\text{C}$ -NMR of probe TCFL

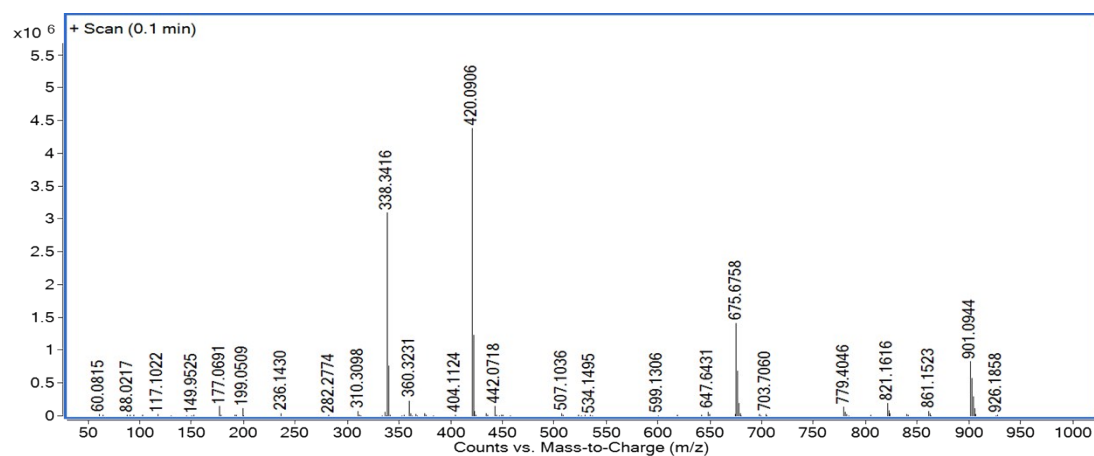

**Fig. S3** HRMS of probe TCFL

## 6. HRMS of the reaction products of probe TCFL and HOCl

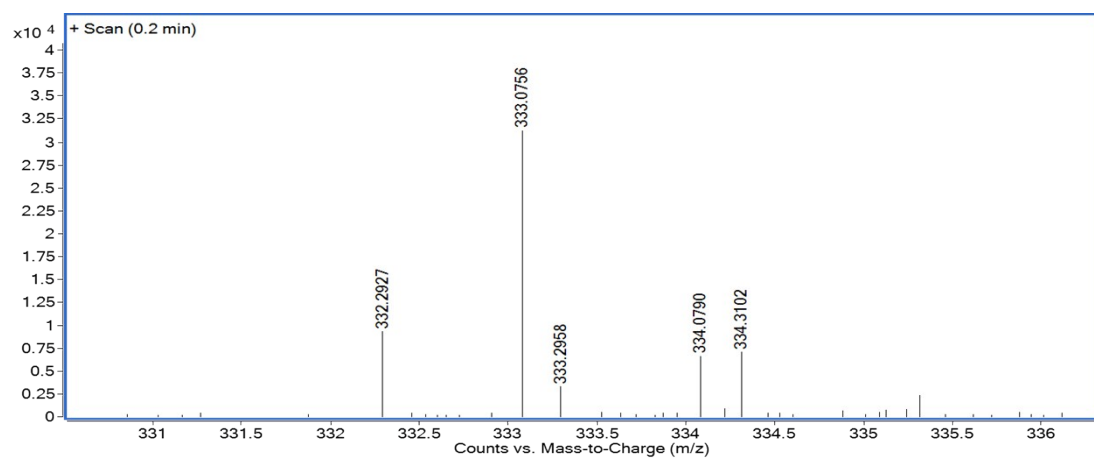

**Fig. S4** HRMS of the reaction products of probe TCFL and HOCl
